# Supplementary material for: Using GIS Model to Evaluate the Industrial Pollution in the Coastal Area of Rabigh Governorate, KSA.
Source: Research Square preprint supplement (doi:10.21203/rs.3.rs-4834302/v1), 2024-09-25
Supplement: Supplementary file 1 [file 12df95c204cbe47ee68ead97.docx]

### Soil sampling

Table: Locations of soil samples

| **No** | **Sample Type** | **Latitude (N)** | **Longitude (E)** |
| --- | --- | --- | --- |
| 1 | Soil Sample | 22.630861° | 39.119908° |
| 2 | Soil Sample | 22.822491° | 38.980472° |
| 3 | Soil Sample | 22.817998° | 39.077563° |
| 4 | Soil Sample | 22.759833° | 39.032133° |
| 5 | Soil Sample | 22.744166° | 39.151106° |
| 6 | Soil Sample | 22.743240° | 39.248470° |
| 7 | Soil Sample | 23.041005° | 38.953340° |
| 8 | Soil Sample | 22.868282° | 39.213894° |
| 9 | Soil Sample | 22.670283° | 39.140521° |
| 10 | Soil Sample | 22.516421° | 39.269138° |
| 11 | Soil Sample | 22.696697° | 39.144092° |
| 12 | Soil Sample | 22.686011° | 39.195880° |
| 13 | Soil Sample | 22.616505° | 39.293668° |
| 14 | Soil Sample | 23.038152° | 38.836486° |
| 15 | Soil Sample | 22.929536° | 38.962304° |
| 16 | Soil Sample | 22.929536° | 38.962304° |
| 17 | Soil Sample | 23.112845° | 39.013116° |
| 18 | Soil Sample | 23.017547° | 39.064272° |
| 19 | Soil Sample | 22.516956° | 39.129690° |
| 20 | Soil Sample | 22.904980° | 39.091590° |

**Table: The result analysis for soil samples.**

|  | **Samples** | | | | | | | | | | | | | | | | | | | |
| --- | --- | --- | --- | --- | --- | --- | --- | --- | --- | --- | --- | --- | --- | --- | --- | --- | --- | --- | --- | --- |
|  | **1** | **2** | **3** | **4** | **5** | **6** | **7** | **8** | **9** | **10** | **11** | **12** | **13** | **14** | **15** | **16** | **17** | **18** | **19** | **20** |
| Moisture Content (%) | 5.2 | 1.1 | 0 | 4.8 | 0 | 0 | 0 | 0 | 0 | 0 | 0 | 0 | 0 | 0 | 0 | 0 | 0 | 0 | 0 | 0 |
| pH | 7.0 | 7.9 | 9.6 | 7.9 | 8.8 | 9.5 | 9.5 | 8.8 | 8.6 | 9.6 | 8 | 8.6 | 8.2 | 8.7 | 9.1 | 8.4 | 8.8 | 8.9 | 8.8 | 8 |
| Oil and Grease | 0 | 0 | 0 | 0 | 0 | 0 | 0 | 0 | 0 | 0 | 720 | 190 | 0 | 310 | 290 | 0 | 0 | 0 | 0 | 0 |
| TPH* | 0 | 0 | 0 | 0 | 0 | 0 | 0 | 0 | 0 | 0 | 449 | 81 | 0 | 189 | 169 | 0 | 0 | 0 | 0 | 0 |
| Total  Phenols | 0 | 0 | 0 | 0 | 0 | 0 | 0 | 0 | 0 | 0 | 0 | 0 | 0 | 0 | 0 | 0 | 0 | 0 | 0 | 0 |
| As (mg/kg) | 5.3 | 0 | 5.8 | 5.1 | 0 | 0 | 0 | 0 | 5.3 | 0 | 0 | 0 | 0 | 0 | 0 | 0 | 0 | 0 | 6 | 6 |
| Cd (mg/kg) | 0 | 0 | 0 | 0 | 0 | 0 | 0 | 0 | 0 | 0 | 0 | 0 | 0 | 0 | 0 | 0 | 0 | 0 | 0 | 0 |
| Cr (mg/kg) | 47 | 38 | 41 | 33 | 29 | 38 | 59 | 27 | 37 | 30 | 77 | 92 | 88 | 58 | 55 | 79 | 22 | 97 | 90 | 77 |
| Cu (mg/kg) | 33 | 28 | 34 | 20 | 20 | 28 | 27 | 23 | 24 | 16 | 26 | 27 | 29 | 23 | 21 | 33 | 30 | 32 | 32 | 26 |
| Pb (mg/kg) | 0 | 0 | 0 | 0 | 0 | 0 | 0 | 0 | 0 | 0 | 0 | 0 | 0 | 0 | 0 | 0 | 0 | 0 | 0 | 0 |
| Ni (mg/kg) | 61 | 39 | 49 | 31 | 30 | 49.9 | 90 | 28 | 46 | 21 | 131 | 88 | 98 | 67 | 56 | 119 | 33 | 50 | 127 | 81 |
| F  (mg/kg) | 1 | 0 | 1.0 | 1.0 | 0 | 0 | 0 | 0 | 0 | 0 | 0 | 0 | 0 | 0 | 0 | 0 | 0 | 0 | 0 | 0 |
| Zn (mg/kg) | 54. | 45 | 56 | 34 | 35 | 39 | 38 | 48 | 40 | 41 | 39 | 40 | 56 | 35 | 34 | 45 | 42 | 46 | 47 | 39 |
| Ag (mg/kg) | 0 | 0 | 0 | 0 | 0 | 0 | 0 | 0 | 0 | 0 | 0 | 0 | 0 | 0 | 0 | 0 | 0 | 0 | 0 | 0 |
| Se (mg/kg) | 0 | 0 | 0 | 0 | 0 | 0 | 0 | 0 | 0 | 0 | 0 | 0 | 0 | 0 | 0 | 0 | 0 | 0 | 0 | 0 |
| Mn (mg/kg) | 475 | 421 | 504 | 462 | 349 | 559 | 416 | 570 | 340 | 295 | 439 | 389 | 568 | 362 | 328 | 421 | 447 | 458 | 433 | 439 |
| Al (mg/kg) | 1470 | 1190 | 1390 | 1110 | 8780 | 1080 | 9950 | 1100 | 1020 | 8710 | 9834 | 7546 | 8834 | 6348 | 2356 | 5765 | 2366 | 3578 | 1342 | 3589 |
| Fe (mg/kg) | 2840 | 2700 | 2880 | 2210 | 2270 | 2570 | 2530 | 2680 | 2480 | 2360 | 2580 | 2740 | 3230 | 2520 | 2380 | 3000 | 2960 | 3180 | 3020 | 2580 |
| Ba (mg/kg) | 37 | 40 | 35 | 28 | 41 | 49 | 43 | 30 | 29 | 98 | 47 | 30 | 94 | 31 | 29 | 36 | 37 | 39 | 36 | 44 |
| V (mg/kg) | 80 | 86 | 72 | 85 | 102 | 81 | 77 | 77 | 48 | 74 | 70 | 66 | 80 | 71 | 66 | 71 | 73 | 77 | 72 | 70 |

*TPH: Total Petroleum Hydrocarbons.
