# Supplementary material for: Using GIS Model to Evaluate the Industrial Pollution in the Coastal Area of Rabigh Governorate, KSA.
Source: Research Square preprint supplement (doi:10.21203/rs.3.rs-4834302/v1), 2024-09-25
Supplement: Supplementary file 2 [file 5be55fd2acb5937a34f18f2a.docx]

Table: Marine sediment samples locations.

| **No** | **Location** | **Sample Type** | **Latitude (N)** | **Longitude (E)** |
| --- | --- | --- | --- | --- |
| 1 | In front of Arabian Cement Company | Sediment sample | 22°34'43.38"N | 39° 4'39.58"E |
| 2 | In front of Border Guard Center | Sediment sample | 22°37'3.22"N | 39° 2'51.92"E |
| 3 | North Shore Coast of Rabigh | Sediment sample | 22°51'7.06"N | 38°54'15.30"E |
| 4 | The Northern area of Khor Al-Kharar | Sediment sample | 22°58'0.64"N | 38°49'11.84"E |
| 5 | In front of Rabigh Port | Sediment sample | 22°44'48.86"N | 38°58'30.02"E |
| 6 | In front of Mastura Beach | Sediment sample | 23° 4'5.42"N | 38°47'59.35"E |
| 7 | Southern part of the study area | Sediment sample | 22°28'51.67"N | 39° 4'46.37"E |
| 8 | Near Rabigh Electricity Company | Sediment sample | 22°40'33.95"N | 39° 1'26.11"E |
| 9 | The Middle area of Khor Al-Kharar | Sediment sample | 22°53'49.33"N | 38°52'27.12"E |
| 10 | Rabigh Beach | Sediment sample | 22°47'30.79"N | 38°57'1.87"E |

**Table: Analysis results marine sediment**

| **Samples** | | | | | | | | | |  |  |
| --- | --- | --- | --- | --- | --- | --- | --- | --- | --- | --- | --- |
| **10** | **9** | **8** | **7** | **6** | **5** | **4** | **3** | **2** | **1** | **Unit** | **Parameters** |
| 8.7 | 8.7 | 8.5 | 8.6 | 8.4 | 8.5 | 8.8 | 8.8 | 8.9 | 8.4 | pH unit | pH |
| 6540 | 7740 | 8910 | 5510 | 6730 | 7010 | 8180 | 8440 | 7020 | 41000 | mg/L | Sodium (Na) |
| 5980 | 6890 | 7970 | 6810 | 5820 | 7500 | 7140 | 7760 | 6680 | 63400 | mg/L | Chloride (Cl) |
| 9140 | 11750 | 16900 | 9210 | 8470 | 5820 | 7860 | 9190 | 16800 | 17900 | mg/L | Sulphates (SO4) |
| 0 | 0 | 0 | 0 | 0 | 0 | 0 | 0 | 0 | 0 | mg/L | Ammonia (NH3) |
| 0 | 0.3 | 0.6 | 0 | 0.1 | 0 | 0 | 0 | 0.4 | 0.5 | mg/L | Nitrate (NO3) |
| 195 | 270 | 610 | 330 | 290 | 310 | 280 | 550 | 250 | 580 | mg/L | Total Nitrogen (TN) |
| 510 | 460 | 812 | 344 | 515 | 396 | 421 | 337 | 308 | 729 | mg/L | Phosphorus (P) |
| 0 | 0 | 0 | 0 | 0 | 0 | 0 | 0 | 0 | 0 | CFU/100mL | Coliform Bacteria |
| 0 | 0 | 0 | 0 | 0 | 0 | 0 | 0 | 0 | 0 | mg/L | Oil and Grease |
| 0 | 0 | 0 | 0 | 0 | 0 | 0 | 0 | 0 | 0 | mg/L | Cadmium (Cd) |
| 0 | 11.8 | 39.7 | 0 | 22.4 | 0 | 0 | 0 | 0 | 32.8 | mg/L | Copper (Cu) |
| 2450 | 3310 | 37200 | 4970 | 7820 | 5590 | 5030 | 2170 | 2800 | 31300 | mg/L | Iron (Fe) |
| 0 | 0 | 0 | 0 | 0 | 0 | 0 | 0 | 0 | 0 | mg/L | Lead (Pb) |
| 0 | 0 | 0 | 0 | 0 | 0 | 0 | 0 | 0 | 0 | mg/L | Mercury (Hg) |
| 0.1 | 0.3 | 0.4 | 0.1 | 0.25 | 0.2 | 0.1 | 0.1 | 0.2 | 0.15 | mg/L | Barium (Ba) |
| 0 | 0 | 0 | 0 | 0 | 0 | 0 | 0 | 0 | 0 | mg/L | Vanadium (V) |
