# Supplementary material for: Using GIS Model to Evaluate the Industrial Pollution in the Coastal Area of Rabigh Governorate, KSA.
Source: Research Square preprint supplement (doi:10.21203/rs.3.rs-4834302/v1), 2024-09-25
Supplement: Supplementary file 3 [file 6995abedce0cc80c9f3a040d.docx]

Table: Locations of Groundwater samples

| **No** | **Location** | **Latitude (N)** | **Longitude (E)** |
| --- | --- | --- | --- |
| 1 | Istdama landfill (Northern area) | 22° 39' 28.19" | 39° 11' 20.13" |
| 2 | Istdama landfill (Southern area) | 22° 39' 13.05" | 39° 11' 18.92" |
| 3 | GEMS landfill (Northern area) | 22° 39` 43`` | 39° 11` 12`` |
| 4 | GEMS landfill (Southern area) | 22° 39' 25.77" | 39° 11' 5.75" |
| 5 | SEPCO landfill (Northern area) | 22° 39' 48.08" | 39° 11' 32.06" |
| 6 | SEPCO landfill (Southern area) | 22° 39' 32.74" | 39° 11' 28.03" |
| 7 | Veal landfill | 22° 39' 29.93" | 39° 11' 28.58" |
| 8 | Veal landfill | 22° 39' 16.62" | 39° 11' 28.71" |
| 9 | Horizon landfill | 22° 39' 4.14" | 39° 11' 19.08" |
| 10 | Nabi Farm | 22° 45' 24.4" | 39° 15' 36.3" |
| 11 | Rashid Farm | 22° 45' 8.43" | 39° 11' 35.20" |
| 12 | Saleh Farm | 22° 43' 28.81" | 39° 16' 18.16" |
| 13 | Gaman Farm | 22° 48' 35.67" | 39° 11' 53.50" |
| 14 | Al-Numan farm | 22° 30' 30.34" | 39° 13' 27.03" |
| 15 | Groundwater Well No 1 | 22° 32' 11.09" | 39° 16' 1.39" |
| 16 | Groundwater Well No 2 | 22° 34' 9.75" | 39° 12' 44.96" |
| 17 | Groundwater Well No 3 | 22° 36' 7.17" | 39° 19' 18.80" |
| 18 | Groundwater Well No 4 | 22° 36' 36.68" | 39° 15' 11.88" |
| 19 | Groundwater Well No 5 | 22° 29' 18.68" | 39° 5' 51.38" |
| 20 | Groundwater Well No 6 | 22° 50' 36.00" | 38° 56' 52.00" |
| 21 | Qahtani Farm | 23° 5' 37.96" | 38° 49' 4.96" |
| 22 | Al-Maged Farm | 23° 6' 37.28" | 39° 1' 25.26" |
| 23 | Al-Sarhani Farm | 23° 0' 25.57" | 38° 55' 10.86" |
| 24 | Old Well | 22° 56' 29.36" | 39° 4' 28.97" |

**Table: The result analysis for groundwater samples (From 1 to 12).**

|  | **1** | **2** | **3** | **4** | **5** | **6** | **7** | **8** | **9** | **10** | **11** | **12** |
| --- | --- | --- | --- | --- | --- | --- | --- | --- | --- | --- | --- | --- |
| **pH** | 6.95 | 7.02 | 6.98 | 7.13 | 6.81 | 6.48 | 7.97 | 4.58 | 6.88 | 7.58 | 7.12 | 7.03 |
| **TDS** | 67100 | 47400 | 70500 | 67400 | 80300 | 64100 | 2170 | 60200 | 48700 | 1490 | 9960 | 10800 |
| **TSS** | 44 | 56 | 63 | 28 | 204 | 950 | 6 | 260 | 630 | 0 | 0 | 0 |
| **BOD** | 0 | 0 | 0 | 0 | 0 | 2 | 0 | 0 | 0 | 0 | 0 | 0 |
| **COD** | 76 | 80 | 84 | 84 | 76 | 81 | 10 | 77 | 80 | 27 | 52 | 78 |
| **DO** | 9 | 9.1 | 9.2 | 9.3 | 8.8 | 6.6 | 9.1 | 8.7 | 8.6 | 8.5 | 8.5 | 8.4 |
| **Oil & Grease** | 0 | 0 | 0 | 0 | 0 | 0 | 0 | 0 | 0 | 0 | 0 | 0 |
| **Carbolic Acid (C6H5OH)** | 0 | 0 | 0.64 | 0.33 | 0 | 0.55 | 0.09 | 0.67 | 0.44 | 0 | 0 | 0 |
| **Total Organic Compounds (TOC)** | 0 | 0 | 0 | 0 | 0 | 102 | 0 | 0 | 0 | 0 | 0 | 0 |
| **HCO3** | 62 | 71 | 68 | 48 | 38 | 99 | 93 | 0 | 134 | 206 | 192 | 108 |
| **Cl** | 37200 | 32100 | 38700 | 37000 | 44900 | 35700 | 483 | 33800 | 26900 | 542 | 3280 | 5320 |
| **Ca** | 2890 | 3650 | 5670 | 4820 | 6420 | 4920 | 299 | 5380 | 3790 | 85 | 873 | 461 |
| **Mg** | 9.4 | 1.7 | 1.8 | 1.6 | 2.1 | 1.6 | 0.3 | 0.7 | 1.7 | 0.1 | 0.2 | 0.4 |
| **K** | 369 | 214 | 216 | 178 | 253 | 242 | 15 | 192 | 299 | 14 | 15 | 75 |
| **Na** | 17800 | 14200 | 16200 | 15800 | 19000 | 14900 | 308 | 12400 | 11500 | 342 | 2000 | 3090 |
| **SO4-2** | 770 | 810 | 760 | 800 | 940 | 620 | 929 | 530 | 950 | 282 | 300 | 886 |
| **Selenium (Se)** | 0.4 | 0.7 | 0.5 | 0.6 | 0.6 | 0.01 | 0.3 | 0.4 | 0.6 | 0 | 0 | 0 |
| **Al** | 1.06 | 1.74 | 0.55 | 0 | 4.75 | 23.5 | 0.45 | 0.45 | 68.1 | 0 | 0 | 0 |
| **As** | 0 | 0 | 0 | 0 | 0 | 0.032 | 0 | 0 | 0.059 | 0 | 0 | 0 |
| **Cd** | 0 | 0.196 | 0.436 | 0.968 | 1.42 | 0 | 0 | 0 | 0.0014 | 0 | 0 | 0 |
| **Cr** | 0 | 0 | 0 | 0 | 0.026 | 0.792 | 0 | 0 | 2.96 | 0 | 0 | 0 |
| **Co** | 0 | 0 | 0 | 0 | 0 | 0.160 | 0 | 0 | 0.640 | 0 | 0 | 0 |
| **Cu** | 0 | 0 | 0 | 0 | 0.021 | 0.261 | 0 | 0 | 1.16 | 0 | 0 | 0 |
| **Fe** | 1.40 | 2.40 | 0.98 | 0.24 | 6.84 | 3.25 | 0.72 | 1.7 | 7.2 | 0.01 | 0.01 | 0.81 |
| **Pb** | 0.027 | 0.049 | 0.016 | 0 | 0.054 | 0.093 | 0.013 | 0 | 0.409 | 0 | 0 | 0 |
| **Mn** | 0.077 | 0.047 | 0.033 | 0 | 0.111 | 8.20 | 0.014 | 3.36 | 16.2 | 0 | 0 | 0.461 |
| **Hg** | 0 | 0 | 0 | 0 | 0 | 0 | 0 | 0 | 0 | 0 | 0 | 0 |
| **Ni** | 0.010 | 0.011 | 0 | 0 | 0 | 0.734 | 0.002 | 0 | 3.73 | 0 | 0 | 0 |
| **Sulphate (S)** | 0 | 0 | 0 | 0 | 0 | 0 | 0 | 0 | 0.04 | 0 | 0.03 | 0 |
| **Ag** | 0 | 0 | 0 | 0 | 0 | 0 | 0 | 0 | 0 | 0 | 0 | 0 |
| **V** | 0 | 0 | 0 | 0 | 0 | 0.65 | 0.01 | 0 | 3 | 0.01 | 0.02 | 0 |
| **Zn** | 0.171 | 0.100 | 8.62 | 3.44 | 0 | 0.555 | 0.052 | 0 | 3.17 | 0.008 | 0 | 0.044 |
| **NH3** | 0 | 0 | 0 | 0 | 0 | 0 | 0.04 | 0.08 | 0 | 0.02 | 0.04 | 2.69 |
| **NO3** | 22.8 | 14.9 | 18.5 | 7.16 | 0 | 0.02 | 1.51 | 0 | 0.27 | 2.02 | 4.89 | 0.03 |
| **NO2** | 0.44 | 0 | 0 | 0 | 0 | 0 | 0 | 0 | 0 | 0 | 0 | 0.04 |
| **PO4** | 5.84 | 6.04 | 1.59 | 2.33 | 1.16 | 2.67 | 0.10 | 2.08 | 25.8 | 0.11 | 0.64 | 0.11 |
| **Total Nitrogen (TN)** | 0.6 | 0.4 | 0.3 | 0.2 | 0.4 | 1.4 | 0.5 | 1.5 | 4.9 | 0.4 | 0.1 | 2.8 |
| **Total Phenols (TP)** | 1.91 | 1.97 | 1.52 | 0.76 | 0.38 | 0.87 | 0.03 | 0.68 | 8.40 | 0.04 | 0.21 | 0.04 |
| **Total Coliform** | 0 | 0 | 0 | 0 | 0 | 0 | 0 | 0 | 0 | 0 | 2400 | 1000 |

**Table: The result analysis for groundwater samples (From 13 to 24).**

|  | **13** | **14** | **15** | **16** | **17** | **18** | **19** | **20** | **21** | **22** | **23** | **24** |
| --- | --- | --- | --- | --- | --- | --- | --- | --- | --- | --- | --- | --- |
| **pH** | 7.15 | 8.08 | 7.61 | 7.33 | 7.82 | 7.68 | 8.21 | 7.51 | 7.30 | 7.11 | 7.75 | 7.44 |
| **TDS** | 6560 | 7740 | 7940 | 7988 | 8050 | 7890 | 8227 | 8098 | 7798 | 7940 | 7896 | 7955 |
| **TSS** | 0 | 0 | 133 | 255 | 130 | 170 | 622 | 299 | 120 | 212 | 244 | 230 |
| **BOD** | 0 | 0 | 0 | 0 | 0 | 0 | 0 | 0 | 0 | 0 | 0 | 0 |
| **COD** | 58 | 46 | 89 | 131 | 91 | 94 | 154 | 133 | 44 | 39 | 28 | 35 |
| **DO** | 9.1 | 9.2 | 10.4 | 10.9 | 11.0 | 10.7 | 12 | 9 | 8.8 | 11.2 | 10.9 | 9.9 |
| **Oil & Grease** | 0 | 0 | 0 | 0 | 0 | 0 | 0 | 0 | 0 | 0 | 0 | 0 |
| **Carbolic Acid (C6H5OH)** | 0 | 0 | 0 | 0 | 0 | 0 | 0 | 0 | 0 | 0 | 0 | 0 |
| **Total Organic Compounds (TOC)** | 0 | 0 | 39 | 65 | 46 | 40 | 69 | 22 | 0 | 0 | 0 | 0 |
| **HCO3** | 62 | 148 | 77 | 84 | 63 | 55 | 199 | 122 | 78 | 82 | 94 | 97 |
| **Cl** | 3820 | 3166 | 3280 | 3280 | 3330 | 3290 | 3910 | 3110 | 1440 | 1410 | 855 | 919 |
| **Ca** | 653 | 126 | 133 | 622 | 315 | 643 | 322 | 121 | 94 | 195 | 188 | 179 |
| **Mg** | 1.3 | 1.1 | 1 | 0.2 | 0.4 | 0.8 | 2.1 | 0.6 | 0.04 | 0.01 | 0.02 | 0.01 |
| **K** | 42 | 12 | 22 | 46 | 19 | 25 | 51 | 38 | 17 | 12 | 15 | 17 |
| **Na** | 1360 | 255 | 1540 | 1558 | 1560 | 1540 | 1489 | 1322 | 140 | 127 | 119 | 137 |
| **SO4-2** | 258 | 329 | 910 | 895 | 880 | 950 | 998 | 719 | 250 | 310 | 221 | 219 |
| **Selenium (Se)** | 0 | 0 | 0 | 0 | 0 | 0 | 0.1 | 0 | 0 | 0 | 0 | 0 |
| **Al** | 0 | 0 | 0 | 0 | 0 | 0 | 0.9 | 0.4 | 0 | 0 | 0 | 0 |
| **As** | 0 | 0 | 0.001 | 0.003 | 0.005 | 0.004 | 0.008 | 0 | 0 | 0 | 0 | 0 |
| **Cd** | 0 | 0 | 0 | 0 | 0 | 0 | 1.21 | 0 | 0 | 0 | 0 | 0 |
| **Cr** | 0 | 0.003 | 0 | 0 | 0 | 0 | 0.002 | 0 | 0 | 0 | 0 | 0 |
| **Co** | 0 | 0 | 0.095 | 0.033 | 0.611 | 0.935 | 0.098 | 0 | 0 | 0 | 0 | 0 |
| **Cu** | 0 | 0 | 0.094 | 0.068 | 0.158 | 0.242 | 0.46 | 0 | 0 | 0 | 0 | 0 |
| **Fe** | 0.19 | 0.01 | 0.061 | 0.094 | 0.431 | 0.669 | 0.86 | 0.11 | 0 | 0 | 0 | 0 |
| **Pb** | 0 | 0 | 0 | 0 | 0 | 0 | 0.02 | 0 | 0 | 0 | 0 | 0 |
| **Mn** | 0.548 | 0 | 0.102 | 0.162 | 0.328 | 0.504 | 0.634 | 0 | 0 | 0 | 0 | 0 |
| **Hg** | 0 | 0 | 0 | 0 | 0 | 0 | 0 | 0 | 0 | 0 | 0 | 0 |
| **Ni** | 0 | 0.002 | 0.074 | 0.351 | 0.464 | 0.713 | 0.088 | 0 | 0 | 0 | 0 | 0 |
| **Sulphate (S)** | 0 | 0 | 0 | 0 | 0 | 0 | 0 | 0 | 0 | 0 | 0 | 0 |
| **Ag** | 0 | 0 | 0 | 0 | 0 | 0 | 0 | 0 | 0 | 0 | 0 | 0 |
| **V** | 0 | 0.01 | 0.11 | 0.42 | 0.65 | 0.94 | 0 | 0 | 0 | 0 | 0 | 0 |
| **Zn** | 0 | 0.047 | 0.237 | 1.12 | 1.54 | 2.35 | 2.11 | 1.95 | 0 | 0 | 0 | 0 |
| **NH3** | 0.16 | 0.05 | 0.05 | 0.11 | 0.04 | 0.05 | 0.6 | 0.1 | 0 | 0 | 0 | 0 |
| **NO3** | 0.34 | 11.7 | 0.65 | 0.49 | 0.59 | 0.38 | 8.6 | 2.4 | 0 | 0 | 0 | 0 |
| **NO2** | 0.03 | 0 | 0 | 0 | 0 | 0 | 12 | 0 | 0 | 0 | 0 | 0 |
| **PO4** | 0 | 0.11 | 0 | 0 | 0 | 0 | 0.3 | 0 | 0 | 0 | 0 | 0 |
| **Total Nitrogen (TN)** | 0.6 | 12.9 | 0.77 | 0.83 | 0.57 | 0.81 | 14.8 | 9.97 | 0.55 | 0.42 | 0.38 | 0.47 |
| **Total Phenols (TP)** | 0 | 0.04 | 0 | 0 | 0 | 0 | 0.09 | 0 | 0 | 0 | 0 | 0 |
| **Total Coliform** | 0 | 0 | 0 | 0 | 0 | 0 | 0 | 0 | 0 | 0 | 0 | 0 |
