# Supplementary material for: Using GIS Model to Evaluate the Industrial Pollution in the Coastal Area of Rabigh Governorate, KSA.
Source: Research Square preprint supplement (doi:10.21203/rs.3.rs-4834302/v1), 2024-09-25
Supplement: Supplementary file 4 [file 727bc60d464e50b4527d7378.docx]

## **Location of the study area:**

Figure 1.2: National Context of Rabigh City

The study area (Figure 1.3) covers 2526 km2 from Rabigh Governorate, which included (3) centers, namely, Rabigh, Mastura, and Al-Qadimah. This area represents (37.8 %) of the total area of Rabigh, amounting to (6679.03) km2. The following table shows the coordinates of the study area.

Table 1.1: The coordinates of the study area.

| **No** | **Latitude (N)** | **Longitude (E)** |
| --- | --- | --- |
| 1 | 23° 4' 22.98" | 38° 44' 9.75" |
| 2 | 23° 9' 5.94" | 39° 2' 40.80" |
| 3 | 22° 28' 1.76" | 39° 3' 57.41" |
| 4 | 22° 34' 10.03" | 39° 23' 35.96" |


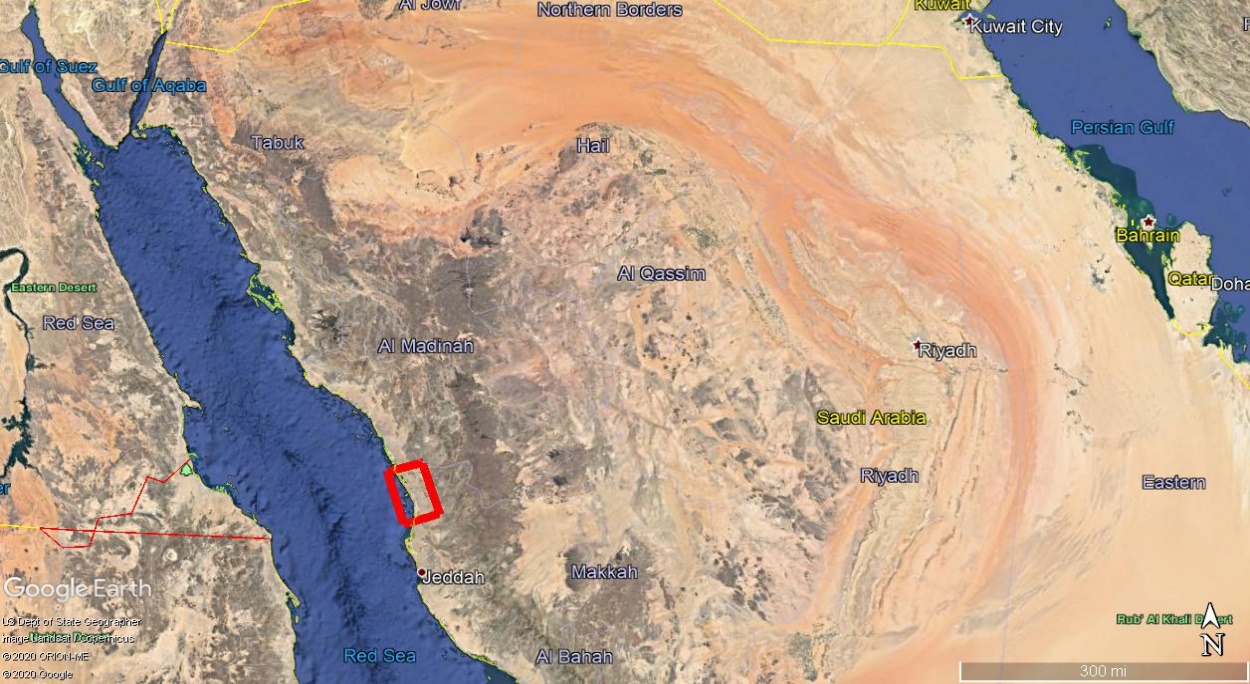


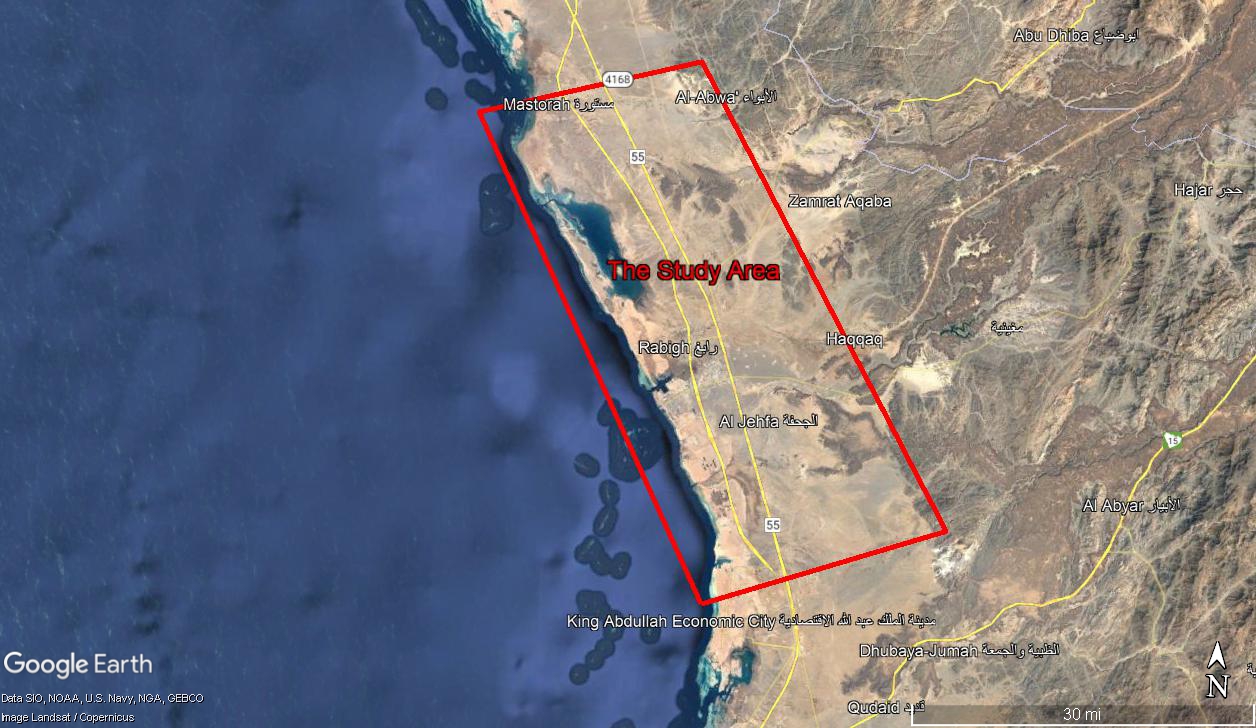


**Figure 1.3: Location Map for the study area.**

**Air Sampling**

### **First: Air Monitoring using AQMML**

The study initiated with the selection of Five representable monitoring sites for the air pollutants considered to be of importance, Figure 4.3. These site selections were based on a study of the prevalent wind direction and a site visit. The selected sites as follow:

- Mastoura City (A1): 23° 5'36.63"N , 38°56'41.84"E
- Rabigh Hospital (A2): 22°46'21.37"N, 39° 2'6.76"E
- Rabigh Airport (A3): 22°42'15.81"N, 39° 3'41.95"E
- Miqat Al Juhfa (A4): 22°42'20.65"N, 39° 8'43.95"E
- Rabigh IC (A5): 22°35'30.48"N, 39°12'33.78"E

Five Air quality mobile monitoring lab (AQMML) were installed in the previous locations for one month at every location from 15th of September to 15th of October 2020, Figure 4. Sampling of hourly average inhalable particulates (PM10), oxides of nitrogen (NO2), Ozone (O3), Hydrogen sulfide (H2S), sulfur dioxide (SO2), carbon monoxide (CO) and carbon dioxide (CO2) concentrations, as well as meteorological parameters was conducted.


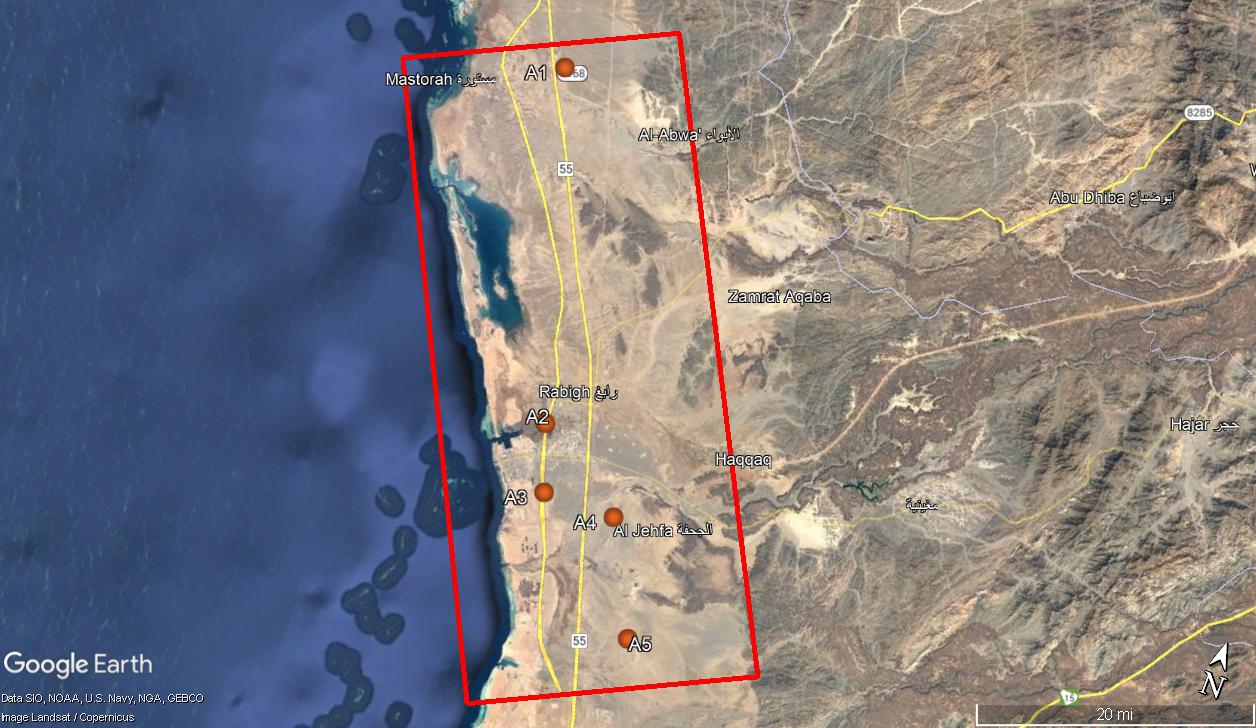


Figure 4.3: Diagram indicating the aspects to be studied -in blue- as part of this study

**Results of pollutant measurements using AQMML**

Table 4.5: AQMML results in Mastoura city (A1) from 15th of September to 15th of October 2020

|  | **PM 10 (µg/ m3)** | **CO**  **(µg/ m3)** | **NO2**  **(µg/ m3)** | **SO2**  **(µg/ m3)** | **O3**  **(µg/ m3)** | **H2S**  **(µg/ m3)** |
| --- | --- | --- | --- | --- | --- | --- |
| Minimum concentration per hour |  | 0.01 | 0.1 | 0.4 | 2 |  |
| Highest concentration per hour |  | 5.42 | 58 | 128 | 104 |  |
| Average concentration level per hour |  | 0.9 | 8 | 4.4 | 31 |  |
| NCEC scale average hourly |  | **32** | **350** | **280** | **120** |  |
|  |  |  |  |  |  |  |
| Minimum concentration within 8 hours |  | 0.02 |  |  | 2.5 |  |
| Highest concentration in 8 hours |  | 7.83 |  |  | 71 |  |
| Average concentration per 8 hours |  | 0.9 |  |  | 31 |  |
| NCEC scale average 8 hours |  | **8.1** |  |  | **80** |  |
|  |  |  |  |  |  |  |
| Minimum concentration within 24 hours | 25 |  |  | 1.1 |  | 0.1 |
| Highest concentration in 24 hours | 460 |  |  | 21.8 |  | 3.5 |
| Average concentration level 24 hours | 84 |  |  | 4.4 |  | 2.3 |
| NCEC scale average 24 hours | **340** |  |  | **140** |  | **100** |
|  |  |  |  |  |  |  |
| The number of transgressions | **2** |  |  |  |  |  |

Table 4.6: AQMML results in Rabigh Hospital (A2) from 15th of September to 15th of October 2020

|  | **PM 10 (µg/ m3)** | **CO**  **(µg/ m3)** | **NO2**  **(µg/ m3)** | **SO2**  **(µg/ m3)** | **O3**  **(µg/ m3)** | **H2S**  **(µg/ m3)** |
| --- | --- | --- | --- | --- | --- | --- |
| Minimum concentration per hour |  | 0.2 | 0.1 | 1.2 | 2.25 |  |
| Highest concentration per hour |  | 1.4 | 3 | 47 | 89 |  |
| Average concentration level per hour |  | 0.6 | 1 | **2.9** | 25 |  |
| NCEC scale average hourly |  | **32** | **350** | **280** | **120** |  |
|  |  |  |  |  |  |  |
| Minimum concentration within 8 hours |  | 0.21 |  |  | 2.88 |  |
| Highest concentration in 8 hours |  | 1.13 |  |  | 65 |  |
| Average concentration per 8 hours |  | 0.6 |  |  | 25 |  |
| NCEC scale average 8 hours |  | **8.1** |  |  | **80** |  |
|  |  |  |  |  |  |  |
| Minimum concentration within 24 hours | 22 |  |  | 1.5 |  | 0.9 |
| Highest concentration in 24 hours | 80 |  |  | 8.9 |  | 92 |
| Average concentration level 24 hours | 51 |  |  | 2.9 |  | 41.2 |
| NCEC scale average 24 hours | **340** |  |  | **140** |  | **100** |
|  |  |  |  |  |  |  |
| The number of transgressions |  |  |  |  |  |  |

Table 4.7: AQMML results in Rabigh Airport (A3) from 15th of September to 15th of October 2020

|  | **PM 10 (µg/ m3)** | **CO**  **(µg/ m3)** | **NO2**  **(µg/ m3)** | **SO2**  **(µg/ m3)** | **O3**  **(µg/ m3)** | **H2S**  **(µg/ m3)** |
| --- | --- | --- | --- | --- | --- | --- |
| Minimum concentration per hour |  | 0.39 | 3.36 | 0.01 | 2.68 |  |
| Highest concentration per hour |  | 0.94 | 46 | 176 | 87 |  |
| Average concentration level per hour |  | 0.7 | 13 | **7.7** | 36 |  |
| NCEC scale average hourly |  | **32** | **350** | **280** | **120** |  |
|  |  |  |  |  |  |  |
| Minimum concentration within 8 hours |  | 0.43 |  |  | 14.84 |  |
| Highest concentration in 8 hours |  | 0.91 |  |  | 61 |  |
| Average concentration per 8 hours |  | 0.7 |  |  | 36 |  |
| NCEC scale average 8 hours |  | **8.1** |  |  | **80** |  |
|  |  |  |  |  |  |  |
| Minimum concentration within 24 hours | 20 |  |  | 0.35 |  | 0.43 |
| Highest concentration in 24 hours | 110 |  |  | 21.9 |  | 1.39 |
| Average concentration level 24 hours | 63 |  |  | 7.2 |  | 0.9 |
| NCEC scale average 24 hours | **340** |  |  | **140** |  | **100** |
|  |  |  |  |  |  |  |
| The number of transgressions |  |  |  |  |  |  |

Table 4.8: AQMML results in Miqat Al Juhfa (A4) from 15th of September to 15th of October 2020

|  | **PM 10 (µg/ m3)** | **CO**  **(µg/ m3)** | **NO2**  **(µg/ m3)** | **SO2**  **(µg/ m3)** | **O3**  **(µg/ m3)** | **H2S**  **(µg/ m3)** |
| --- | --- | --- | --- | --- | --- | --- |
| Minimum concentration per hour |  | 0.19 | 1.2 | 0.02 | 3.19 |  |
| Highest concentration per hour |  | 1.07 | 43 | 469 | 100 |  |
| Average concentration level per hour |  | 0.5 | 8 | 8.7 | 35 |  |
| NCEC scale average hourly |  | 32 | **350** | **280** | **120** |  |
|  |  |  |  |  |  |  |
| Minimum concentration within 8 hours |  | 0.23 |  |  | 8.57 |  |
| Highest concentration in 8 hours |  | 0.98 |  |  | 80 |  |
| Average concentration per 8 hours |  | 0.5 |  |  | 35 |  |
| NCEC scale average 8 hours |  | **8.1** |  | **---** | **80** |  |
|  |  |  |  |  |  |  |
| Minimum concentration within 24 hours | 1 |  |  | 0.28 |  | 0.03 |
| Highest concentration in 24 hours | 161 |  |  | 60.4 |  | 4.4 |
| Average concentration level 24 hours | 42 |  |  | 8.7 |  | 1.5 |
| NCEC scale average 24 hours | **340** |  |  | **140** |  | **100** |
|  |  |  |  |  |  |  |
| The number of transgressions |  |  |  | **2** |  |  |

Table 4.9: AQMML results in Rabigh IC (A5) from 15th of September to 15th of October 2020

|  | **PM 10 (µg/ m3)** | **CO**  **(µg/ m3)** | **NO2**  **(µg/ m3)** | **SO2**  **(µg/ m3)** | **O3**  **(µg/ m3)** | **H2S**  **(µg/ m3)** |
| --- | --- | --- | --- | --- | --- | --- |
| Minimum concentration per hour |  | 0.25 | 0.1 | 0.1 | 2.8 |  |
| Highest concentration per hour |  | 3.25 | 53 | 637 | 90 |  |
| Average concentration level per hour |  | 1 | 9 | 19.4 | 26 |  |
| NCEC scale average hourly |  | **32** | **350** | **280** | **120** |  |
|  |  |  |  |  |  |  |
| Minimum concentration within 8 hours |  | 0.34 |  |  | 7.31 |  |
| Highest concentration in 8 hours |  | 2.92 |  |  | 49 |  |
| Average concentration per 8 hours |  | 1 |  |  | 26 |  |
| NCEC scale average 8 hours |  | **8.1** |  | **---** | **80** |  |
|  |  |  |  |  |  |  |
| Minimum concentration within 24 hours | 29 |  |  | 1.4 |  | 0.5 |
| Highest concentration in 24 hours | 486 |  |  | 77.8 |  | 3.2 |
| Average concentration level 24 hours | 93 |  |  | 19.4 |  | 1.8 |
| NCEC scale average 24 hours | **340** |  |  | **140** |  | **100** |
|  |  |  |  |  |  |  |
| The number of transgressions |  |  |  | **10** |  |  |

### **Second: Air Monitoring using Portable equipments**

Methods and techniques were explained in detail in chapter 2. The following table shows the locations of air quality measurements with portable devices in Rabigh area.

Table 4.10: locations of air quality measurements with portable devices in Rabigh area.

| **No** | **Locations** | **Latitude** | **Longitude** |
| --- | --- | --- | --- |
| 1 | Arabian Cement Factory - next to the administrative offices | 22.581065 | 39.081718 |
| 2 | Arabian Cement Factory - the main gate | 22.589776 | 39.086514 |
| 3 | Saudi Electricity - next to the operation department | 22.673022 | 39.032060 |
| 4 | Saudi Electricity company- car park | 22.676517 | 39.035129 |
| 5 | Landfill of Sustainability Company | 22.662205 | 39.165142 |
| 6 | Landfill of Municipality – management by GEMS company | 22.657860 | 39.171078 |
| 7 | James Company for hazardous waste landfill | 22.662183 | 39.187709 |
| 8 | Evaporation cells in James landfill | 22.659925 | 39.185543 |
| 9 | Measuring point between GEMS and SEPCO | 22.658474 | 39.186740 |
| 10 | The administrative building of the landfill of SEPCO company | 22.659406 | 39.189582 |
| 11 | Evaporation cells for Sepco landfill | 22.662124 | 39.190059 |
| 12 | The evaporation cells of Phil company landfill | 22.657120 | 39.192436 |
| 13 | Next to the scale for Phil Company | 22.658052 | 39.190164 |
| 14 | Landfill of Afaq Company | 22.651947 | 39.186188 |
| 15 | Miqat Al Juhfa | 22.7049403 | 39.1466894 |
| 16 | Makarem Al Nakheel Hotel | 22.7830734 | 39.0340654 |
| 17 | Al-Amal Medical Center | 22.7851303 | 39.0338998 |
| 18 | Amr Bin Dinar Intermediate School | 22.7715624 | 39.0351011 |
| 19 | General Hospital in Rabigh | 22.7742992 | 39.0334264 |
| 20 | Civil Defense Building | 22.7737498 | 39.0356774 |
| 21 | Muhammad Auf's house | 22.7805384 | 39.0288197 |
| 22 | Vetonit Factory | 22.7646838 | 39.0738654 |
| 23 | Sika company factory | 22.7717766 | 39.0695631 |
| 24 | tropical horizon factory | 22.7738398 | 39.0719278 |
| 25 | GEMS Oil Processing Factory | 22.7624553 | 39.0852011 |
| 26 | Mohammed Nazir Chaudhry Chemical Factory | 22.7642692 | 39.0869462 |
| 27 | Next to Rabigh Coast - Theeb Center | 22.6227128 | 39.0489534 |
| 28 | Kelia Medical Center | 22.5278278 | 39.2965280 |
| 29 | Rabigh desalination plant | 22.7766171 | 38.9672298 |
| 30 | SAPTCO park | 23.1300953 | 38.8392395 |
| 31 | Mastoura Medical Center | 23.1209800 | 38.8380330 |
| 32 | Inside Rabigh Electricity Company | 22.6562095 | 39.0379881 |
| 33 | Zaroy's farm in Kelia | 22.5425470 | 39.3517858 |

###

### Air sampling results

The following table showing the results of air quality measurements in different locations in Rabigh Governorate.

Table 4.11: Air quality results in Rabigh governorate (in ppm).

|  | **Locations** | **H**2**S** | **NO**2 | **SO**2 | **CO**2 | **CO** | **TVOC** | **O**3 | **NH**3 | **Pm 2.5** | **Pm 10** |
| --- | --- | --- | --- | --- | --- | --- | --- | --- | --- | --- | --- |
| 1 | Arabian Cement Factory - next to the administrative offices | 0.27 | 0.00 | 0.83 | 406.36 | 2.58 | 253.00 | 0.38 | 1.05 | 32 | 194 |
| 2 | Arabian Cement Factory - the main gate | 0.03 | 0.00 | 0.05 | 437.00 | 2.75 | 217.56 | 0.22 | 0.66 | 28 | 205 |
| 3 | Saudi Electricity - next to the operation department | 0.01 | 0.00 | 0.03 | 407.00 | 2.83 | 167.33 | 0.21 | 1.18 | 31 | 179 |
| 4 | Saudi Electricity company- car park | 0.05 | 0.00 | 0.10 | 414.33 | 2.40 | 174.22 | 0.22 | 0.80 | 26 | 153 |
| 5 | Landfill of Sustainability Company | 0.04 | 0.00 | 0.09 | 419.70 | 2.32 | 195.20 | 0.21 | 0.84 | 64 | 492 |
| 6 | Landfill of Municipality – management by GEMS company | 0.03 | 0.00 | 0.03 | 474.83 | 2.68 | 159.17 | 0.19 | 0.58 | 57 | 488 |
| 7 | James Company for hazardous waste landfill | 0.10 | 0.00 | 0.07 | 475.38 | 4.23 | 235.23 | 0.22 | 0.56 | 57 | 420 |
| 8 | Evaporation cells in James landfill | 0.00 | 0.00 | 0.06 | 509.50 | 4.74 | 151.63 | 0.22 | 0.39 | 28 | 228 |
| 9 | Measuring point between GEMS and SEPCO | 0.21 | 0.00 | 2.11 | 503.71 | 5.03 | 370.00 | 0.18 | 0.56 | 32 | 302 |
| 10 | The administrative building of the landfill of SEPCO company | 0.08 | 0.00 | 0.79 | 554.50 | 5.14 | 416.25 | 0.17 | 0.35 | 27 | 140 |
| 11 | Evaporation cells for Sepco landfill | 0.11 | 0.00 | 0.98 | 544.00 | 3.75 | 424.38 | 0.21 | 1.50 | 24 | 139 |
| 12 | The evaporation cells of Phil company landfill | 0.23 | 0.00 | 1.87 | 536.33 | 4.22 | 441.17 | 0.19 | 0.93 | 30 | 198 |
| 13 | Next to the scale for Phil Company | 0.08 | 0.00 | 0.60 | 570.67 | 4.63 | 435.80 | 0.20 | 0.98 | 58 | 201 |
| 14 | Landfill of Afaq Company | 0.06 | 0.00 | 0.25 | 517.00 | 2.44 | 513.50 | 0.19 | 1.73 | 42 | 175 |
| 15 | Miqat Al Juhfa | 0.04 | 0.00 | 0.04 | 418.64 | 2.18 | 541.45 | 0.02 | 1.02 | 30 | 186 |
| 16 | Makarem Al Nakheel Hotel | 0.00 | 0.03 | 0.00 | 478.07 | 3.80 | 556.07 | 0.14 | 0.10 | 41 | 277 |
| 17 | Al-Amal Medical Center | 0.02 | 0.06 | 0.03 | 534.50 | 5.93 | 474.78 | 0.22 | 1.09 | 45 | 169 |
| 18 | Amr Bin Dinar Intermediate School | 0.08 | 0.00 | 0.16 | 545.25 | 3.93 | 467.25 | 0.22 | 0.56 | 39 | 192 |
| 19 | General Hospital in Rabigh | 0.10 | 0.00 | 0.10 | 455.25 | 2.31 | 498.00 | 0.23 | 1.81 | 41 | 166 |
| 20 | Civil Defense Building | 0.02 | 0.00 | 0.08 | 565.85 | 4.84 | 521.08 | 0.26 | 0.63 | 53 | 144 |
| 21 | Muhammad Auf's house | 0.07 | 0.00 | 0.14 | 548.62 | 4.02 | 483.00 | 0.26 | 0.49 | 52 | 165 |
| 22 | Vetonit Factory | 0.02 | 0.02 | 0.00 | 440.07 | 3.18 | 356.07 | 0.21 | 0.37 | 50 | 155 |
| 23 | Sika company factory | 0.00 | 0.00 | 0.00 | 480.80 | 2.46 | 297.73 | 0.35 | 0.41 | 46 | 171 |
| 24 | tropical horizon factory | 0.05 | 0.00 | 0.07 | 513.57 | 2.70 | 255.71 | 0.16 | 0.76 | 47 | 162 |
| 25 | GEMS Oil Processing Factory | 0.05 | 0.00 | 0.11 | 488.00 | 2.92 | 241.23 | 0.07 | 0.27 | 34 | 147 |
| 26 | Mohammed Nazir Chaudhry Chemical Factory | 0.05 | 0.00 | 0.11 | 488.00 | 2.92 | 241.23 | 0.07 | 0.27 | 34 | 166 |
| 27 | Next to Rabigh Coast - Theeb Center | 0.07 | 0.00 | 0.12 | 475.67 | 1.32 | 323.17 | 0.08 | 1.49 | 33 | 178 |
| 28 | Kelia Medical Center | 0.07 | 0.00 | 0.01 | 485.36 | 2.36 | 202.91 | 0.03 | 1.47 | 31 | 142 |
| 29 | Rabigh desalination plant | 0.00 | 0.02 | 0.00 | 487.30 | 2.72 | 235.50 | 0.07 | 0.33 | 31 | 223 |
| 30 | SAPTCO park | 0.07 | 0.00 | 0.00 | 477.50 | 2.39 | 181.50 | 0.01 | 1.11 | 30 | 200 |
| 31 | Mastoura Medical Center | 0.04 | 0.00 | 0.01 | 486.13 | 2.80 | 184.88 | 0.07 | 0.30 | 29 | 321 |
| 32 | Inside Rabigh Electricity Company | 0.93 | 0.00 | 0.21 | 465.21 | 2.51 | 173.86 | 0.01 | 0.94 | 28 | 164 |
| 33 | Zaroy's farm in Kelia | 0.00 | 0.06 | 0.00 | 502.18 | 3.37 | 0.16 | 0.19 | 0.40 | 33 | 160 |
|  | **NCEC Regulation Limit** | **0.1** | **0.35** | **0.28** | **-** | **32** | **-** | **0.12** | **-** | **35** | **340** |
