# Supplementary material for: Using GIS Model to Evaluate the Industrial Pollution in the Coastal Area of Rabigh Governorate, KSA.
Source: Research Square preprint supplement (doi:10.21203/rs.3.rs-4834302/v1), 2024-09-25
Supplement: Supplementary file 5 [file a174cd96c85c0db8d2437347.docx]

Table: Seawater samples locations.

| **No** | **Location** | **Sample Type** | **Latitude (N)** | **Longitude (E)** |
| --- | --- | --- | --- | --- |
| 1 | Arabian Cement Company | Seawater sample | 22°34'43.2"N | 39°04'44.0"E |
| 2 | In front of Arabian Cement Company | Seawater sample | 22°34'8.64"N | 39° 3'4.88"E |
| 3 | Saudi Electricity Company | Seawater sample | 22°39'55.84"N | 39° 1'42.85"E |
| 4 | Rabigh water desalination plant | Seawater sample | 22°46'32.41"N | 38°57'45.79"E |
| 5 | Al-Murjan Electricity Company | Seawater sample | 22°37'53.47"N | 39° 2'29.04"E |
| 6 | Rabigh Electricity Company | Seawater sample | 22°38'58.38"N | 39° 1'39.67"E |
| 7 | In front of Rabigh Border Guard Center | Seawater sample | 22°36'49.02"N | 39° 2'42.97"E |
| 8 | Petro Rabigh Residence Complex | Seawater sample | 22°49'3.14"N | 38°55'56.96"E |
| 9 | In front of King Abdullah Port | Seawater sample | 22°30'49.79"N | 39° 4'19.85"E |
| 10 | Southern part of Khor Al-Kharar | Seawater sample | 22°51'08.3"N | 38°54'20.2"E |
| 11 | The northern entrance to Khor Al-Kharar | Seawater sample | 22°57'30.70"N | 38°48'28.47"E |
| 12 | In front of Rabigh Port | Seawater sample | 22°43'22.34"N | 38°57'27.8"E |
| 13 | In front of Mastura beach | Seawater sample | 23° 3'18.20"N | 38°45'29.62"E |
| 14 | In front of middle part of Khor Al-Kharar | Seawater sample | 22°53'13.74"N | 38°51'31.09"E |
| 15 | Middle of the study area | Seawater sample | 22°40'35.28"N | 38°59'26.94"E |
| 16 | North 0f the study area | Seawater sample | 22°59'42.54"N | 38°47'5.76"E |
| 17 | Southern corner of the study area | Seawater sample | 22°28'10.69"N | 39° 3'39.95"E |

Table: Analysis results for seawater samples

| **Samples** | | | | | | | | | | | | | | | | |  |
| --- | --- | --- | --- | --- | --- | --- | --- | --- | --- | --- | --- | --- | --- | --- | --- | --- | --- |
| **17** | **16** | **15** | **14** | **13** | **12** | **11** | **10** | **9** | **8** | **7** | **6** | **5** | **4** | **3** | **2** | **1** |  |
| 8.16 | 8.35 | 8.19 | 8.25 | 8.15 | 8.33 | 7.68 | 8.25 | 8.21 | 8.32 | 8.24 | 8.26 | 8.29 | 8.27 | 8.41 | 7.85 | 7.27 | pH |
| 0 | 0 | 0 | 0 | 0 | 56 | 95.5 | 0.3 | 0.4 | 0 | 4.3 | 0 | 0 | 0 | 0 | 0 | 0.1 | Turbidity |
| 0 | 0 | 0 | 0 | 0 | 46 | 238 | 19 | 10 | 0 | 23 | 0 | 0 | 0 | 0 | 0 | 5 | TSS |
| 41700 | 43400 | 41600 | 43200 | 41200 | 55300 | 62100 | 51400 | 47100 | 43800 | 45000 | 45600 | 44100 | 44300 | 52400 | 43300 | 74200 | TDS |
| 43.5 | 42.7 | 41.9 | 42.3 | 44.1 | 55.2 | 53.8 | 46.8 | 42.2 | 40.7 | 41.8 | 40.7 | 40.7 | 40.6 | 46.0 | 40.2 | 61.4 | Salinity (‰) |
| 22000 | 22400 | 26400 | 28500 | 29700 | 38800 | 33900 | 27200 | 26000 | 24100 | 24900 | 25300 | 24100 | 24400 | 28900 | 23800 | 39900 | Cl |
| 13500 | 13100 | 17500 | 17700 | 16700 | 18800 | 19200 | 16600 | 14500 | 13600 | 13900 | 14000 | 13800 | 13700 | 16200 | 13500 | 23600 | Na |
| 3910 | 3970 | 4750 | 4420 | 5880 | 5750 | 5000 | 4330 | 3680 | 3420 | 3510 | 3540 | 3460 | 3490 | 4110 | 3390 | 6060 | SO4 |
| 0 | 0 | 0 | 0 | 0 | 0 | 0 | 0 | 0 | 0 | 0 | 0 | 0 | 0 | 0 | 0 | 0 | NH3 |
| 0 | 0 | 0 | 0 | 0 | 0 | 0 | 0 | 0 | 0 | 0 | 0 | 0 | 0 | 0 | 0 | 0.05 | NO3 |
| 0 | 0 | 0 | 0 | 0 | 0 | 0 | 0 | 0 | 0 | 0 | 0 | 0 | 0 | 0 | 0 | 0 | NO2 |
| 0.3 | 0.2 | 0.6 | 0.6 | 0.5 | 0.7 | 0.8 | 0.8 | 0.8 | 0.2 | 0.3 | 0.2 | 0.2 | 0.1 | 0 | 0.1 | 0.3 | TN |
| 0.24 | 0.27 | 0.28 | 0.31 | 0.29 | 0.33 | 0.31 | 0.30 | 0.31 | 0.28 | 0.30 | 0.29 | 0.31 | 0.29 | 0.32 | 0.28 | 0.36 | P |
| 0 | 0 | 0 | 0 | 0 | 0 | 0 | 0 | 0 | 0 | 0 | 0 | 0 | 0 | 0 | 0 | 2 | BOD |
| 37 | 86 | 81 | 75 | 80 | 75 | 102 | 79 | 81 | 80 | 77 | 77 | 76 | 79 | 77 | 78 | 79 | COD |
| 0 | 0 | 0 | 0 | 0 | 0 | 0 | 0 | 0 | 0 | 0 | 0 | 0 | 0 | 0 | 0 | 0 | Oil & Grease |
| 0 | 0 | 0 | 0 | 0 | 0 | 0 | 0 | 0 | 0 | 0 | 0 | 0 | 0 | 0 | 0 | 0 | TOC |
| 0 | 0 | 0 | 0 | 0 | 2 | 1 | 0 | 0 | 0 | 0 | 0 | 0 | 0 | 0 | 1 | 1 | Coliform Bacteria |
| 0 | 0 | 0 | 0 | 0 | 0 | 0 | 0 | 0 | 0 | 0 | 0 | 0 | 0 | 0 | 0 | 0 | Cd |
| 0 | 0 | 0 | 0 | 0 | 0.03 | 0.022 | 0 | 0 | 0 | 0 | 0 | 0 | 0 | 0 | 0 | 0 | Cu |
| 0 | 0 | 0 | 0 | 0 | 3.7 | 19.7 | 0 | 0 | 0 | 0.72 | 0 | 0 | 0 | 0 | 0 | 0 | Fe |
| 0 | 0 | 0 | 0 | 0 | 0 | 0 | 0 | 0 | 0 | 0 | 0 | 0 | 0 | 0 | 0 | 0 | Pb |
| 0 | 0 | 0 | 0 | 0 | 0 | 0 | 0 | 0 | 0 | 0 | 0 | 0 | 0 | 0 | 0 | 0 | Hg |

TOC: Total Organic Carbon

TN: Total Nitrogen

P: Total Phosphorus
